# Supplementary material for: Exercise capacity in patients with cystic fibrosis vs. non-cystic fibrosis bronchiectasis
Source: PubMed Central journal article supplement (PMC6563963; doi:10.1371/journal.pone.0217491), 2019-06-13
Supplement: pone.0217491.s003.pdf [file pone.0217491.s003.pdf]

| Branches/mi ending | CT score | Breathing Reserve (%) | Breathing Reserve [L] | MVV (L/min) | VEE (l/min) | VO2 Specific (ml/kg/min) | Set O2 Post | Set O2 Pre | O2 pulse | O2 pulse pred | Lower VV/VC/D2 | HR (bpm) | HR max | HR   | VO2 (Pred) | VO2 Absolute (ml/min) | FEV 1.0 (Pred) | FEV 1.0 (J/Sec) | FVC (Pred) | FVC (L) | BM (kg) | BM parameters (m) | BM   | WEIGHT (kg) | HEIGHT (cm) | Gender     | DOB (dd/mm) | Subject No. |    |
|--------------------|----------|-----------------------|-----------------------|-------------|-------------|--------------------------|-------------|------------|----------|---------------|----------------|----------|--------|------|------------|-----------------------|----------------|-----------------|------------|---------|---------|-------------------|------|-------------|-------------|------------|-------------|-------------|----|
| CF                 | 12       | 1.2                   | 0.9                   | 100         | 44          | 1.0                      | 100         | 100        | 12       | 1.0           | 1.0            | 100      | 100    | 100  | 100        | 100                   | 100            | 100             | 100        | 100     | 100     | 100               | 100  | 100         | 100         | 100        | 100         | 100         |    |
| CF                 | 12       | 27.18                 | 26.8                  | 96.9        | 72          | 34.43                    | 99          | 99         | 11.3     | 107           | 26.8           | 107      | 107    | 269  | 269        | 75                    | 2.47           | 88              | 3.28       | 0.66    | 70%     | 24.3              | 63   | 161         | F           | 26/07/1995 | 2           |             |    |
| CF                 | 4        | 27.26                 | 34.2                  | 82.2        | 100         | 34.2                     | 100         | 100        | 11.1     | 109           | 27.1           | 109      | 109    | 271  | 271        | 79                    | 2.68           | 111             | 3.68       | 0.88    | 81%     | 21.4              | 59.5 | 166.5       | F           | 26/03/2001 | 3           |             |    |
| CF                 | 16       | 5.5                   | 4                     | 72          | 84          | 3.5                      | 84          | 84         | 8.8      | 100           | 5.0            | 100      | 100    | 100  | 100        | 29                    | 1.05           | 53              | 2.24       | 0.73    | 77%     | 25                | 69   | 166         | M           | 30-02-1976 | 4           |             |    |
| CF                 | 0        | 46.26                 | 42                    | 85          | 44          | 26.7                     | 85          | 100        | 10.3     | 102           | 22             | 102      | 102    | 22   | 102        | 72                    | 2.13           | 77              | 2.64       | 1.46    | 90%     | 29                | 72   | 157         | F           | 12/12/1989 | 5           |             |    |
| CF                 | 17       | 13.65                 | 14                    | 67          | 67          | 42                       | 100         | 100        | 8.7      | 140           | 100            | 140      | 140    | 100  | 100        | 52                    | 2.12           | 81              | 2.81       | 0.51    | 80%     | 22                | 29   | 111         | M           | 29/12/2000 | 6           |             |    |
| CF                 | 1        | 20.04                 | 20.27                 | 95          | 100         | 20.04                    | 98          | 100        | 10.3     | 100           | 20.0           | 100      | 100    | 100  | 100        | 65                    | 2.44           | 75              | 2.67       | 1.76    | 90%     | 30.5              | 85.7 | 160         | M           | 20/07/1979 | 8           |             |    |
| CF                 | 3        | 24.16                 | 27                    | 85          | 48          | 48.7                     | 100         | 100        | 10.9     | 107           | 30             | 107      | 107    | 107  | 107        | 91                    | 2.49           | 99              | 3.1        | 1.35    | 13%     | 16.6              | 39.8 | 155         | M           | 27/05/2000 | 9           |             |    |
| CF                 | 3        | 16.04                 | 16                    | 89          | 37          | 16.04                    | 100         | 100        | 9.6      | 100           | 20             | 100      | 100    | 20   | 100        | 71                    | 1.77           | 106             | 2.17       | 1.76    | 20%     | 17.0              | 42   | 130         | F           | 10/02/1997 | 10          |             |    |
| CF                 | 0        | 36.26                 | 43                    | 112         | 79          | 112                      | 100         | 100        | 10.9     | 87            | 30             | 100      | 100    | 87   | 100        | 55                    | 2.49           | 99              | 3.1        | 1.35    | 13%     | 16.6              | 39.8 | 155         | M           | 27/05/2000 | 9           |             |    |
| CF                 | 0        | 49.36                 | 27.2                  | 62.8        | 69          | 23.69                    | 99          | 100        | 10.0     | 90            | 30             | 90       | 90     | 90   | 90         | 51                    | 2.37           | 65              | 2.31       | 2.39    | 3%      | 18.9              | 41.2 | 166         | M           | 20/11/2000 | 11          |             |    |
| CF                 | 16       | 42.6                  | 24.7                  | 30.3        | 91          | 24.7                     | 91          | 100        | 6.7      | 41            | 101            | 113      | 113    | 41   | 101        | 32                    | 0.77           | 10              | 0.77       | 0.8     | 20%     | 14.6              | 146  | 111         | M           | 26/03/2001 | 13          |             |    |
| CF                 | 12       | 22.20                 | 21.3                  | 95.6        | 69          | 40.63                    | 97          | 100        | 14.9     | 109           | 20.6           | 109      | 109    | 20.6 | 109        | 86                    | 1.92           | 88              | 2.72       | 1.59    | 96%     | 25.1              | 60   | 154.5       | M           | 26/10/2001 | 14          |             |    |
| CF                 | 1        | 14                    | 14                    | 14          | 14          | 14                       | 14          | 14         | 14       | 14            | 14             | 14       | 14     | 14   | 14         | 14                    | 14             | 14              | 14         | 14      | 14      | 14                | 14   | 14          | 14          | 14         | 14          | 14          |    |
| CF                 | 18       | -2.2                  | 1.7                   | 47          | 47          | 29.7                     | 84          | 95         | 11.3     | 85            | 83             | 85       | 85     | 100  | 100        | 30                    | 1.15           | 54              | 2.05       | 0.83    | 20%     | 20.3              | 55.4 | 165         | M           | 26/09/1998 | 16          |             |    |
| CF                 | 13       | 31.16                 | 31                    | 76.2        | 76          | 44.4                     | 100         | 100        | 10.6     | 106           | 46.07          | 106      | 106    | 106  | 106        | 75                    | 2.17           | 1.6             | 2.17       | 1.6     | 90%     | 17.4              | 44   | 144         | F           | 10/07/1997 | 17          |             |    |
| CF                 | 3        | 11.84                 | 3                     | 48          | 48          | 48.1                     | 100         | 100        | 10.6     | 106           | 10.6           | 106      | 106    | 106  | 106        | 88                    | 2.45           | 51              | 2.45       | 0.31    | 20%     | 11.8              | 39.5 | 149         | M           | 26/03/2000 | 18          |             |    |
| CF                 | 3        | 10.2                  | 0                     | 60          | 60          | 60.6                     | 98          | 98         | 8.4      | 107           | 149            | 149      | 149    | 107  | 149        | 39                    | 1.31           | 88              | 1.64       | -0.017  | 40%     | 15.5              | 25   | 127         | M           | 30/10/2006 | 20          |             |    |
| CF                 | 10       | 32.26                 | 30                    | 86          | 46          | 46                       | 99          | 99         | 8.5      | 87            | 239            | 239      | 239    | 87   | 239        | 89                    | 3.03           | 100             | 3.03       | 1.44    | 10%     | 20.8              | 52   | 168         | M           | 30/06/2000 | 21          |             |    |
| CF                 | 11       | 11.1                  | 5                     | 40          | 40          | 40.8                     | 99          | 99         | 5.5      | 111           | 41             | 111      | 111    | 41   | 111        | 64                    | 1.11           | 74              | 1.18       | 1.44    | 7%      | 11.1              | 24.2 | 132         | F           | 02/06/2000 | 22          |             |    |
| CF                 | 20       | -61.76                | -28                   | 45.4        | 74.4        | 35.5                     | 88          | 88         | 12.2     | 78            | 29.3           | 78       | 78     | 29.3 | 78         | 72                    | 23.4           | 25              | 1.86       | 43      | 2.31    | 0.47              | 68%  | 24.1        | 72          | 173        | M           | 26/02/1988  | 23 |
| CF                 | 16       | 58.96                 | 8.7                   | 91.6        | 44.58       | 42.8                     | 94          | 94         | 10.8     | 122           | 92.8           | 122      | 122    | 94   | 122        | 79                    | 1.79           | 99              | 2.76       | 0.83    | 20%     | 15.4              | 28   | 102         | F           | 26/11/2006 | 24          |             |    |
| CF                 | 5        | 29.88                 | 34                    | 114         | 84          | 29.88                    | 98          | 98         | 15.2     | 108           | 28             | 108      | 108    | 28   | 108        | 88                    | 3.47           | 111             | 3.47       | 0.11    | 5%      | 21                | 58   | 166         | M           | 23/08/1997 | 25          |             |    |
| CF                 | 5        | 29.26                 | 24                    | 100         | 97          | 42                       | 100         | 100        | 14.8     | 107           | 14.8           | 107      | 107    | 107  | 107        | 107                   | 107            | 107             | 107        | 107     | 107     | 107               | 107  | 107         | 107         | 107        | 107         | 107         |    |
| CF                 | 4        | 25.26                 | 39                    | 155         | 68          | 155                      | 99          | 99         | 15.3     | 99            | 99             | 99       | 99     | 107  | 107        | 102                   | 1.5            | 106             | 4.72       | 0.73    | 77%     | 24                | 71   | 172         | M           | 17/05/1996 | 27          |             |    |
| CF                 | 28       | 16.26                 | 28                    | 99          | 81          | 28.2                     | 100         | 100        | 8.9      | 100           | 28.2           | 100      | 100    | 81   | 100        | 88                    | 1.2            | 108             | 2.83       | 1.2     | 88%     | 24.4              | 84   | 162         | M           | 26/02/2000 | 28          |             |    |
| CF                 | 13       | 20.26                 | 7.6                   | 37.6        | 30          | 22.9                     | 84          | 94         | 7.5      | 94            | 29.2           | 94       | 94     | 29.2 | 94         | 24                    | 0.94           | 46              | 2.1        | -2.51   | 1%      | 17.4              | 49   | 168         | M           | 18/07/1983 | 29          |             |    |
| CF                 | 5        | 42.06                 | 30                    | 138         | 80          | 42                       | 97          | 97         | 13.3     | 105           | 205            | 205      | 205    | 105  | 205        | 89                    | 3.45           | 86              | 3.85       | 1.39    | 12%     | 18.6              | 50.1 | 161         | M           | 26/09/1994 | 30          |             |    |
| CF                 | 27       | 22.86                 | 35.9                  | 146         | 106         | 43.22                    | 107         | 107        | 16.4     | 74            | 184            | 184      | 184    | 74   | 184        | 51                    | 1.4            | 105             | 1.99       | 0.28    | 20%     | 19.5              | 49.2 | 159         | F           | 02/06/1992 | 31          |             |    |
| CF                 | 16       | 27.16                 | 35.5                  | 146         | 106         | 43.22                    | 107         | 107        | 16.4     | 74            | 184            | 184      | 184    | 74   | 184        | 51                    | 1.4            | 105             | 1.99       | 0.28    | 20%     | 19.5              | 49.2 | 159         | F           | 02/06/1992 | 31          |             |    |
| CF                 | 19       | 48.46                 | 67                    | 149         | 109         | 52.13                    | 107         | 107        | 16.7     | 91            | 117            | 117      | 117    | 91   | 117        | 86                    | 1.65           | 76              | 1.65       | -1.44   | 7%      | 18.1              | 64   | 163         | M           | 26/03/1995 | 32          |             |    |
| CF                 | 11       | 30.06                 | 39                    | 149         | 109         | 52.13                    | 107         | 107        | 16.7     | 91            | 117            | 117      | 117    | 91   | 117        | 86                    | 1.65           | 76              | 1.65       | -1.44   | 7%      | 18.1              | 64   | 163         | M           | 26/03/1995 | 32          |             |    |
| CF                 | 11       | 30.06                 | 39                    | 149         | 109         | 52.13                    | 107         | 107        | 16.7     | 91            | 117            | 117      | 117    | 91   | 117        | 86                    | 1.65           | 76              | 1.65       | -1.44   | 7%      | 18.1              | 64   | 163         | M           | 26/03/1995 | 32          |             |    |
| CF                 | 11       | 30.06                 | 39                    | 149         | 109         | 52.13                    | 107         | 107        | 16.7     | 91            | 117            | 117      | 117    | 91   | 117        | 86                    | 1.65           | 76              | 1.65       | -1.44   | 7%      | 18.1              | 64   | 163         | M           | 26/03/1995 | 32          |             |    |
| CF                 | 11       | 30.06                 | 39                    | 149         | 109         | 52.13                    | 107         | 107        | 16.7     | 91            | 117            | 117      | 117    | 91   | 117        | 86                    | 1.65           | 76              | 1.65       | -1.44   | 7%      | 18.1              | 64   | 163         | M           | 26/03/1995 | 32          |             |    |
| CF                 | 11       | 30.06                 | 39                    | 149         | 109         | 52.13                    | 107         | 107        | 16.7     | 91            | 117            | 117      | 117    | 91   | 117        | 86                    | 1.65           | 76              | 1.65       | -1.44   | 7%      | 18.1              | 64   | 163         | M           | 26/03/1995 | 32          |             |    |
| CF                 | 11       | 30.06                 | 39                    | 149         | 109         | 52.13                    | 107         | 107        | 16.7     | 91            | 117            | 117      | 117    | 91   | 117        | 86                    | 1.65           | 76              | 1.65       | -1.44   | 7%      | 18.1              | 64   | 163         | M           | 26/03/1995 | 32          |             |    |
| CF                 | 11       | 30.06                 | 39                    | 149         | 109         | 52.13                    | 107         | 107        | 16.7     | 91            | 117            | 117      | 117    | 91   | 117        | 86                    | 1.65           | 76              | 1.65       | -1.44   | 7%      | 18.1              | 64   | 163         | M           | 26/03/1995 | 32          |             |    |
| CF                 | 11       | 30.06                 | 39                    | 149         | 109         | 52.13                    | 107         | 107        | 16.7     | 91            | 117            | 117      | 117    | 91   | 117        | 86                    | 1.65           | 76              | 1.65       | -1.44   | 7%      | 18.1              | 64   | 163         | M           | 26/03/1995 | 32          |             |    |
| CF                 | 11       | 30.06                 | 39                    | 149         | 109         | 52.13                    | 107         | 107        | 16.7     | 91            | 117            | 117      | 117    | 91   | 117        | 86                    | 1.65           | 76              | 1.65       | -1.44   | 7%      | 18.1              | 64   | 163         | M           | 26/03/1995 | 32          |             |    |
| CF                 | 11       | 30.06                 | 39                    | 149         | 109         | 52.13                    | 107         | 107        | 16.7     | 91            | 117            | 117      | 117    | 91   | 117        | 86                    | 1.65           | 76              | 1.65       | -1.44   | 7%      | 18.1              | 64   | 163         | M           | 26/03/1995 | 32          |             |    |
| CF                 | 11       | 30.06                 | 39                    | 149         | 109         | 52.13                    | 107         | 107        | 16.7     | 91            | 117            | 117      | 117    | 91   | 117        | 86                    | 1.65           | 76              | 1.65       | -1.44   | 7%      | 18.1              | 64   | 163         | M           | 26/03/1995 | 32          |             |    |
| CF                 | 11       | 30.06                 | 39                    | 149         | 109         | 52.13                    | 107         | 107        | 16.7     | 91            | 117            | 117      | 117    | 91   | 117        | 86                    | 1.65           | 76              | 1.65       | -1.44   | 7%      | 18.1              | 64   | 163         | M           | 26/03/1995 | 32          |             |    |
| CF                 | 11       | 30.06                 | 39                    | 149         | 109         | 52.13                    | 107         | 107        | 16.7     | 91            | 117            | 117      | 117    | 91   | 117        | 86                    | 1.65           | 76              | 1.65       | -1.44   | 7%      | 18.1              | 64   | 163         | M           | 26/03/1995 | 32          |             |    |
| CF                 | 11       | 30.06                 | 39                    | 149         | 109         | 52.13                    | 107         | 107        | 16.7     | 91            | 117            | 117      | 117    | 91   | 117        | 86                    | 1.65           | 76              | 1.65       | -1.44   | 7%      | 18.1              | 64   | 163         | M           | 26/03/1995 | 32          |             |    |
| CF                 | 11       | 30.06                 | 39                    | 149         | 109         | 52.13                    | 107         | 107        | 16.7     | 91            | 117            | 117      | 117    | 91   | 117        | 86                    | 1.65           | 76              | 1.65       | -1.44   | 7%      | 18.1              | 64   | 163         | M           | 26/03/1995 | 32          |             |    |
| CF                 | 11       | 30.06                 | 39                    | 149         | 109         | 52.13                    | 107         | 107        | 16.7     | 91            | 117            | 117      | 117    | 91   | 117        | 86                    | 1.65           | 76              | 1.65       | -1.44   | 7%      | 18.1              | 64   | 163         | M           | 26/03/1995 | 32          |             |    |
| CF                 | 11       | 30.06                 | 39                    | 149         | 109         | 52.13                    | 107         | 107        | 16.7     | 91            | 117            | 117      | 117    | 91   | 117        | 86                    | 1.65           | 76              | 1.65       | -1.44   | 7%      | 18.1              | 64   | 163         | M           | 26/03/1995 | 32          |             |    |
| CF                 | 11       | 30.06                 | 39                    | 149         | 109         | 52.13                    | 107         | 107        | 16.7     | 91            | 117            | 117      | 117    | 91   | 117        | 86                    | 1.65           | 76              | 1.65       | -1.44   | 7%      | 18.1              | 64   | 163         | M           | 26/03/1995 | 32          |             |    |
| CF                 | 11       | 30.06                 | 39                    | 149         | 109         | 52.13                    | 107         | 107        | 16.7     | 91            | 117            | 117      | 117    | 91   | 117        | 86                    | 1.65           | 76              | 1.65       | -1.44   | 7%      | 18.1              | 64   | 163         | M           | 26/03/1995 | 32          |             |    |
| CF                 | 11       | 30.06                 | 39                    | 149         | 109         | 52.13                    | 107         | 107        | 16.7     | 91            | 117            | 117      | 117    | 91   | 117        | 86                    | 1.65           | 76              | 1.65       | -1.44   | 7%      | 18.1              | 64   | 163         | M           | 26/03/1995 | 32          |             |    |
| CF                 | 11       | 30.06                 | 39                    | 149         | 109         | 52.13                    | 107         | 107        | 16.7     | 91            | 117            | 117      | 117    | 91   | 117        | 86                    | 1.65           | 76              | 1.65       | -1.44   | 7%      | 18.1              | 64   | 163         | M           | 26/03/1995 | 32          |             |    |
| CF                 | 11       | 30.06                 | 39                    | 149         | 109         | 52.13                    | 107         | 107        | 16.7     | 91            | 117            | 117      | 117    | 91   |            |                       |                |                 |            |         |         |                   |      |             |             |            |             |             |    |
